# Supplementary material for: Optimization of the Fermentation Conditions of Metarhizium robertsii and Its Biological Control of Wolfberry Root Rot Disease
Source: MDPI journal article supplement (doi:10.3390/microorganisms11102380), 2023-09-23
Supplement: s1 [file s1]

**Table S1**

Table S1. Codes and levels of factors for response surface methodology experiments

| Level | Factor |                        |                  |
|-------|--------|------------------------|------------------|
|       | A      | B                      | C                |
|       | pH     | Rotational speed (rpm) | Temperature (°C) |
| -1    | 6      | 180                    | 28               |
| 0     | 7      | 190                    | 29               |
| 1     | 8      | 200                    | 30               |

**Table S2**

Table S2. Experimental design and results of strain culture conditions

| Number | Factor |                        |                  | Inhibition rate (%) |
|--------|--------|------------------------|------------------|---------------------|
|        | A      | B                      | C                |                     |
|        | pH     | Rotational speed (rpm) | Temperature (°C) |                     |
| 1      | -1     | -1                     | 0                | 43.79               |
| 2      | 1      | -1                     | 0                | 33.48               |
| 3      | -1     | 1                      | 0                | 38.46               |
| 4      | 1      | 1                      | 0                | 40.01               |
| 5      | -1     | 0                      | -1               | 41.83               |
| 6      | 1      | 0                      | -1               | 32.97               |
| 7      | -1     | 0                      | 1                | 45.78               |
| 8      | 1      | 0                      | 1                | 38.70               |
| 9      | 0      | -1                     | -1               | 32.80               |
| 10     | 0      | 1                      | -1               | 30.18               |
| 11     | 0      | -1                     | 1                | 39.82               |
| 12     | 0      | 1                      | 1                | 40.42               |
| 13     | 0      | 0                      | 0                | 50.08               |
| 14     | 0      | 0                      | 0                | 53.24               |
| 15     | 0      | 0                      | 0                | 51.62               |
| 16     | 0      | 0                      | 0                | 51.40               |
| 17     | 0      | 0                      | 0                | 52.19               |

**Table S3**

Table S3. Regression analysis of experimental results based on Box-Behnken design

| Source         | Sum of squares | DF | Mean square | F-value | P-value   |
|----------------|----------------|----|-------------|---------|-----------|
| Model          | 886.29         | 9  | 98.48       | 34.03   | <0.0001** |
| A-pH           | 76.26          | 1  | 76.26       | 26.36   | 0.0013*   |
| B-speed        | 0.084          | 1  | 0.084       | 0.029   | 0.8695    |
| C-temperature  | 90.72          | 1  | 90.72       | 31.35   | 0.0008*   |
| AB             | 35.16          | 1  | 35.16       | 12.15   | 0.0102*   |
| AC             | 0.79           | 1  | 0.79        | 0.27    | 0.6170    |
| BC             | 2.59           | 1  | 2.59        | 0.90    | 0.3754    |
| A <sup>2</sup> | 80.70          | 1  | 80.70       | 27.89   | 0.0011*   |
| B <sup>2</sup> | 296.60         | 1  | 296.60      | 102.51  | <0.0001** |
| C <sup>2</sup> | 237.35         | 1  | 237.35      | 82.03   | <0.0001** |
| Residual       | 20.25          | 7  | 2.89        |         |           |
| Lack of Fit    | 14.92          | 3  | 4.97        | 3.73    | 0.1179    |
| Pure Error     | 5.33           | 4  | 1.33        |         |           |
| Total          | 906.55         | 16 |             |         |           |
| R <sup>2</sup> | 0.9777         |    |             |         |           |

Note: \* indicates significant difference at  $P < 0.05$  and \*\* indicates extremely significant difference at  $P < 0.01$ .
